# Supplementary material for: Nanothermometers based on lanthanide incorporated Periodic Mesoporous Organosilica
Source: Royal Society of Chemistry journal article supplement (doi:10.1039/c8tc06353b), 2019-01-01
Supplement: c8tc06353b1.pdf [file c8tc06353b1.pdf]

# Supporting Information

## Nanothermometers based on lanthanide incorporated Periodic Mesoporous Organosilica

Anna M. Kaczmarek\*, Rik Van Deun, Pascal Van Der Voort\*

Table S1. Relative Ln<sup>3+</sup> contents for the Eu<sub>x</sub>Tb<sub>y</sub>DPA-PMO and Sm<sub>x</sub>Tb<sub>y</sub>DPA-PMO samples during synthesis (calcd.) and as determined by XRF.

| Sample                                        | Molar amounts used in synthesis [mmol] |                   |                   | Eu <sup>3+</sup> ion |       | Sm <sup>3+</sup> ion |       | Tb <sup>3+</sup> ion |       |
|-----------------------------------------------|----------------------------------------|-------------------|-------------------|----------------------|-------|----------------------|-------|----------------------|-------|
|                                               | EuCl <sub>3</sub>                      | SmCl <sub>3</sub> | TbCl <sub>3</sub> | Calcd.               | XRF   | Calcd.               | XRF   | Calcd.               | XRF   |
| Eu <sub>0.25</sub> Tb <sub>0.75</sub> DPA-PMO | 0.25                                   | -                 | 0.75              | 25%                  | 23.4% | -                    | -     | 75%                  | 76.6% |
| Eu <sub>0.50</sub> Tb <sub>0.50</sub> DPA-PMO | 0.50                                   | -                 | 0.50              | 50%                  | 46.1% | -                    | -     | 50%                  | 53.9% |
| Eu <sub>0.75</sub> Tb <sub>0.25</sub> DPA-PMO | 0.75                                   | -                 | 0.25              | 75%                  | 74.7% | -                    | -     | 25%                  | 25.3% |
| Sm <sub>0.90</sub> Tb <sub>0.10</sub> DPA-PMO | -                                      | 0.90              | 0.10              | -                    | -     | 90%                  | 87.7% | 10%                  | 12.3% |
| Sm <sub>0.95</sub> Tb <sub>0.05</sub> DPA-PMO | -                                      | 0.95              | 0.05              | -                    | -     | 95%                  | 95.8% | 5%                   | 4.2%  |

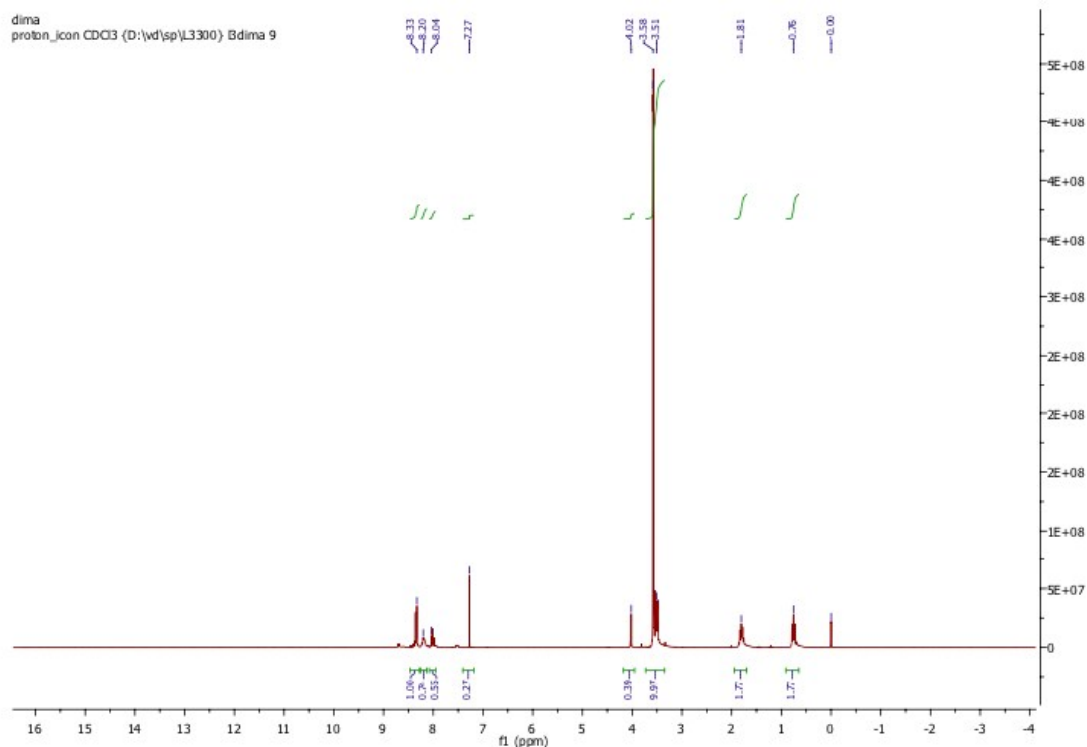

Fig. S1 <sup>1</sup>H NMR of the DPA-PMO precursor (CDCl<sub>3</sub>, 300 MHz).

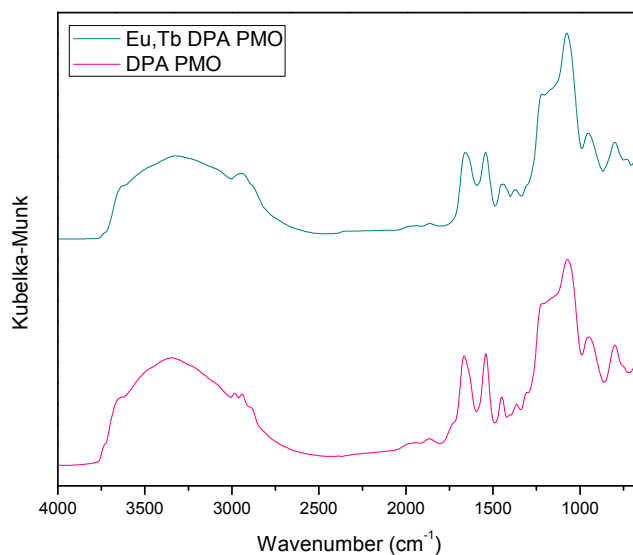

Fig. S2 FT-IR spectra of DPA-PMO and  $\text{Eu}_{0.50}\text{Tb}_{0.50}\text{DPA-PMO}$ .

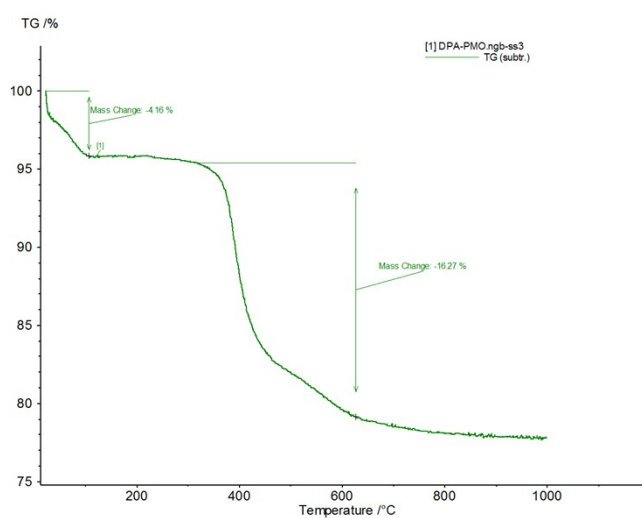

Fig. S3 TG analysis of DPA-PMO material.

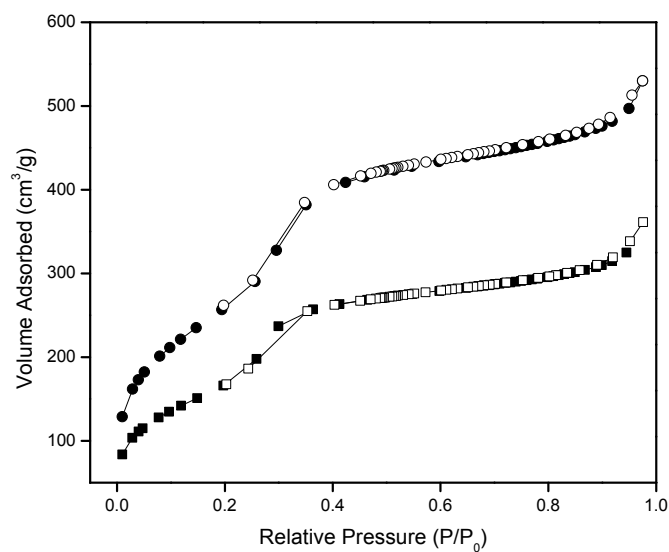

Fig. S4  $\text{N}_2$  adsorption-desorption isotherm of DPA-PMO (circles) and  $\text{Eu}_{0.25}\text{Tb}_{0.75}\text{DPA-PMO}$  (squares).

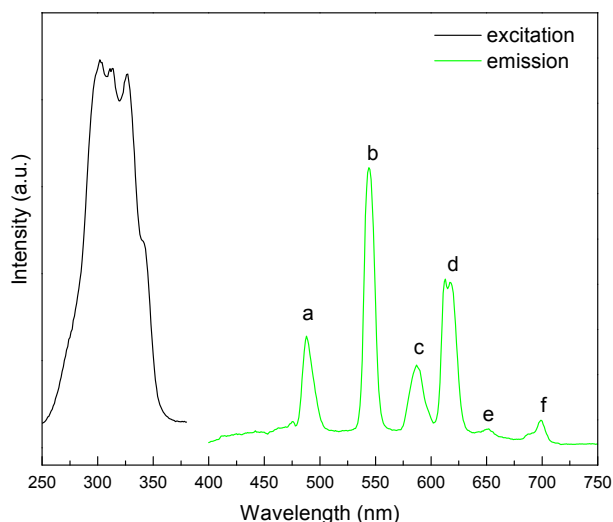

Fig. S5 Room temperature combined excitation-emission spectrum of sample  $\text{Eu}_{0.25}\text{Tb}_{0.75}\text{DPA-PMO}$  (excited a 326.0 nm and observed at 544.6 nm).

Table S2 Assignment of peaks labeled in Fig. S5 ( $\text{Eu}_{0.25}\text{Tb}_{0.75}\text{DPA-PMO}$ ).

| Peak            | Wavelength (nm) | Wavenumber ( $\text{cm}^{-1}$ ) | Transition                                   |
|-----------------|-----------------|---------------------------------|----------------------------------------------|
| <b>Emission</b> |                 |                                 |                                              |
| a               | 488.5           | 20470                           | $^5\text{D}_4 \rightarrow ^7\text{F}_6$ (Tb) |
| b               | 544.6           | 18362                           | $^5\text{D}_4 \rightarrow ^7\text{F}_5$ (Tb) |
| c               | 587.5           | 17021                           | $^5\text{D}_0 \rightarrow ^7\text{F}_1$ (Eu) |
| d               | 613.0           | 16313                           | $^5\text{D}_0 \rightarrow ^7\text{F}_2$ (Eu) |
| e               | 650.8           | 15365                           | $^5\text{D}_0 \rightarrow ^7\text{F}_3$ (Eu) |
| f               | 699.7           | 14292                           | $^5\text{D}_0 \rightarrow ^7\text{F}_4$ (Eu) |

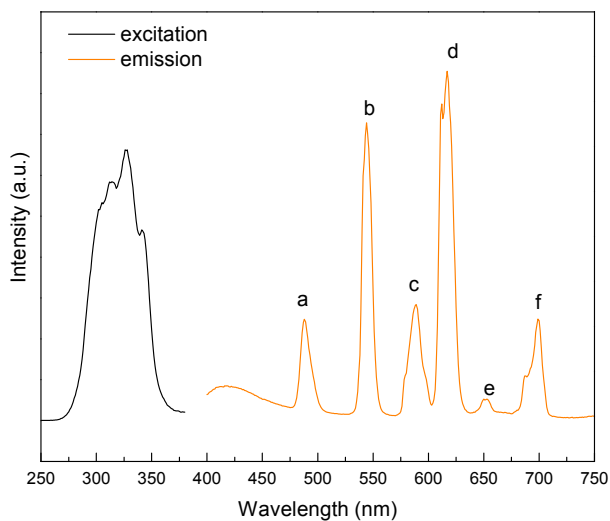

Fig. S6 Room temperature combined excitation-emission spectrum of sample  $\text{Eu}_{0.50}\text{Tb}_{0.50}\text{DPA-PMO}$  (excited a 326.0 nm and observed at 617.1 nm).

Table S3. Assignment of peaks labeled in Fig. S6 ( $\text{Eu}_{0.50}\text{Tb}_{0.50}\text{DPA-PMO}$ ).

| Peak            | Wavelength (nm) | Wavenumber<br>( $\text{cm}^{-1}$ ) | Transition                                   |
|-----------------|-----------------|------------------------------------|----------------------------------------------|
| <b>Emission</b> |                 |                                    |                                              |
| a               | 487.4           | 20517                              | $^5\text{D}_4 \rightarrow ^7\text{F}_6$ (Tb) |
| b               | 544.6           | 18362                              | $^5\text{D}_4 \rightarrow ^7\text{F}_5$ (Tb) |
| c               | 588.5           | 16992                              | $^5\text{D}_0 \rightarrow ^7\text{F}_1$ (Eu) |
| d               | 617.1           | 16205                              | $^5\text{D}_0 \rightarrow ^7\text{F}_2$ (Eu) |
| e               | 651.8           | 15342                              | $^5\text{D}_0 \rightarrow ^7\text{F}_3$ (Eu) |
| f               | 699.4           | 14298                              | $^5\text{D}_0 \rightarrow ^7\text{F}_4$ (Eu) |

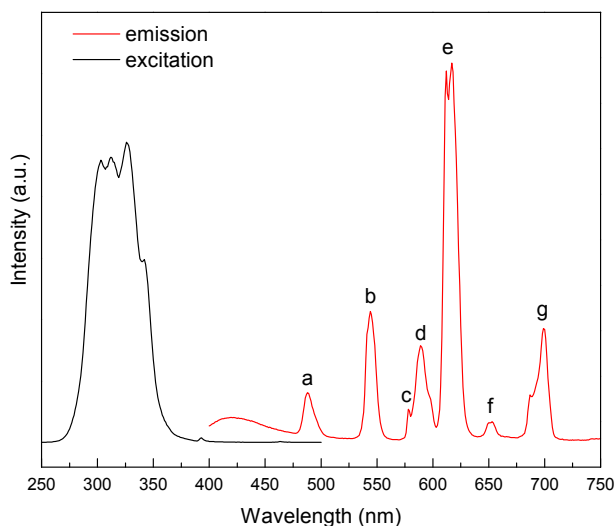

Fig. S7 Room temperature combined excitation-emission spectrum of sample  $\text{Eu}_{0.75}\text{Tb}_{0.25}\text{DPA-PMO}$  (excited at 326.0 nm and observed at 617.7 nm).

Table S4. Assignment of peaks labeled in Fig. S7 ( $\text{Eu}_{0.75}\text{Tb}_{0.25}\text{DPA-PMO}$ ).

| Peak            | Wavelength (nm) | Wavenumber<br>( $\text{cm}^{-1}$ ) | Transition                                   |
|-----------------|-----------------|------------------------------------|----------------------------------------------|
| <b>Emission</b> |                 |                                    |                                              |
| a               | 488.1           | 20487                              | $^5\text{D}_4 \rightarrow ^7\text{F}_6$ (Tb) |
| b               | 544.0           | 18382                              | $^5\text{D}_4 \rightarrow ^7\text{F}_5$ (Tb) |
| c               | 579.3           | 17262                              | $^5\text{D}_0 \rightarrow ^7\text{F}_0$ (Eu) |
| c               | 589.8           | 16955                              | $^5\text{D}_0 \rightarrow ^7\text{F}_1$ (Eu) |
| d               | 617.7           | 16189                              | $^5\text{D}_0 \rightarrow ^7\text{F}_2$ (Eu) |
| e               | 651.5           | 15349                              | $^5\text{D}_0 \rightarrow ^7\text{F}_3$ (Eu) |
| f               | 698.9           | 14308                              | $^5\text{D}_0 \rightarrow ^7\text{F}_4$ (Eu) |

Table S5. CIE color coordinates (x, y) at different temperatures for  $\text{Eu}_{0.25}\text{Tb}_{0.75}\text{DPA-PMO}$ .

| Temperature [K] | x coordinate | y coordinate |
|-----------------|--------------|--------------|
| 260             | 0.4081       | 0.4864       |
| 280             | 0.4042       | 0.4855       |
| 300             | 0.4066       | 0.4824       |
| 320             | 0.4124       | 0.4773       |
| 340             | 0.4221       | 0.4589       |
| 360             | 0.4323       | 0.4580       |
| 380             | 0.4509       | 0.4413       |
| 400             | 0.4586       | 0.4334       |

|     |        |        |
|-----|--------|--------|
| 420 | 0.4677 | 0.4218 |
| 440 | 0.4810 | 0.4051 |
| 460 | 0.4964 | 0.3898 |

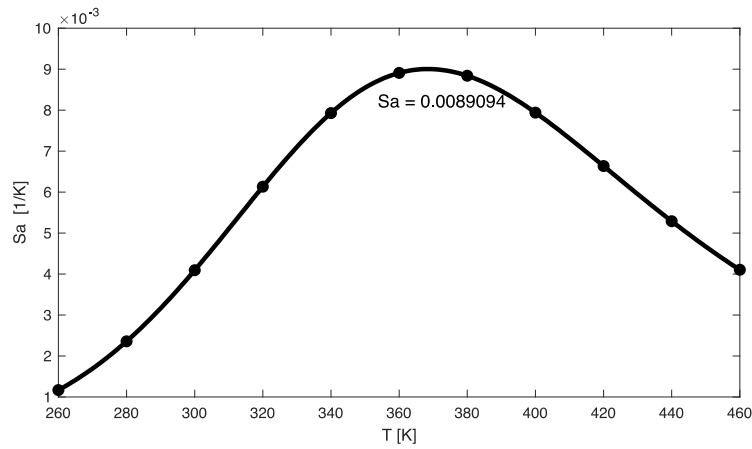

Fig. S8 Plot presenting the absolute sensitivity  $S_a$  values at varied temperatures (260K – 460K) for  $\text{Eu}_{0.25}\text{Tb}_{0.75}\text{DPA-PMO}$ . The solid lines are guides for eyes.

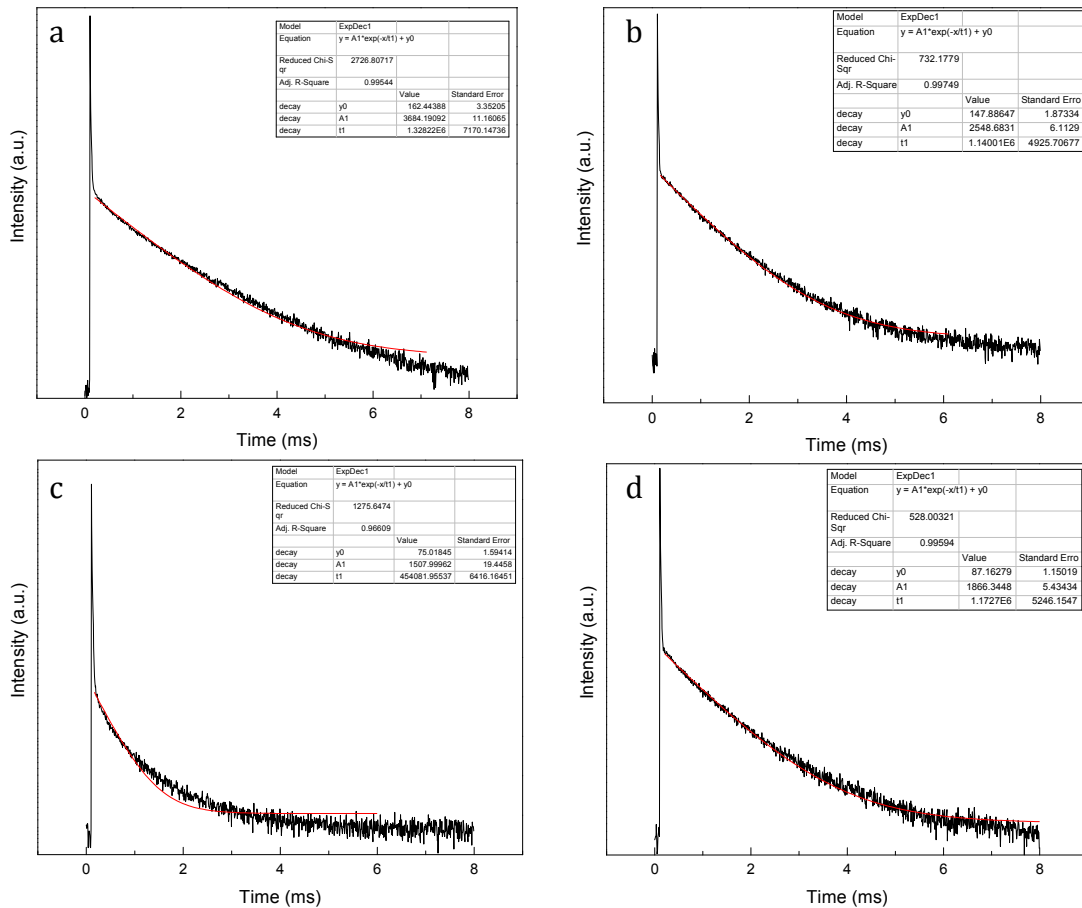

Fig. S9 Decay profiles for sample  $\text{Eu}_{0.25}\text{Tb}_{0.75}\text{DPA-PMO}$  a) 260 K observed at 544.6 nm (Tb), b) 260 K observed at 613.0 nm (Eu), c) 460 K observed at 544.6 nm (Tb), d) 460 K observed at 613.0 nm (Eu). All decay times were recorded when exciting at 326.0 nm.

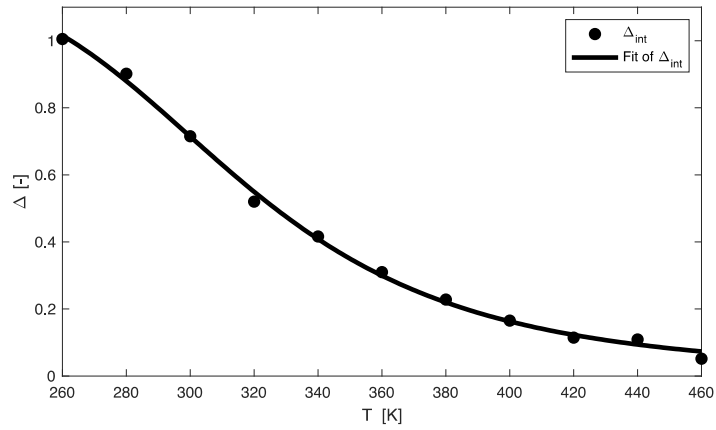

Fig. S10 Plot presenting the calibration curve for  $\text{Eu}_{0.50}\text{Tb}_{0.50}\text{DPA-PMO}$  material when eqn (2) is employed. The points show the experimental delta parameters and the solid line shows the best fit of the experimental points using eqn (2) ( $R^2 = 0.99778$ ).

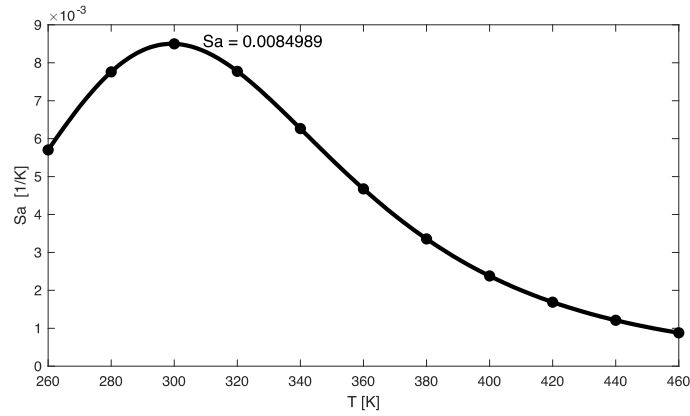

Fig. S11 Plot presenting the absolute sensitivity  $S_a$  values at varied temperatures (260K - 460K) for  $\text{Eu}_{0.50}\text{Tb}_{0.50}\text{DPA-PMO}$ . The solid lines are guides for eyes.

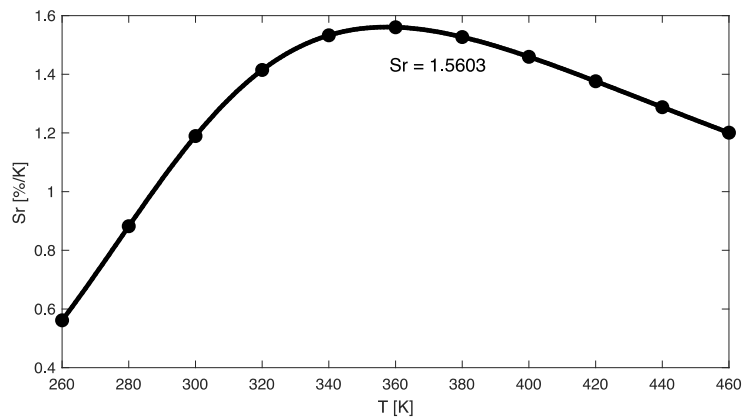

Fig. S12 Plot presenting the relative sensitivity  $S_r$  values at varied temperatures (260K - 460K) for compound  $\text{Eu}_{0.50}\text{Tb}_{0.50}\text{DPA-PMO}$ . The solid lines are guides for eyes.

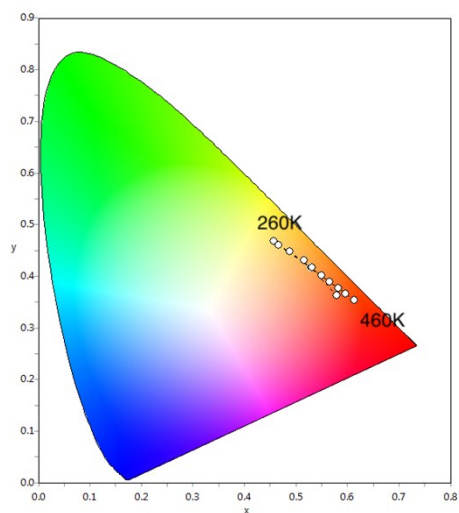

Fig. S13 CIE coordination diagram where the change of color for the  $\text{Eu}_{0.50}\text{Tb}_{0.50}\text{DPA-PMO}$  material is shown from 260 K to 460 K.

Table S6. CIE color coordinates (x, y) at different temperatures for  $\text{Eu}_{0.50}\text{Tb}_{0.50}\text{DPA-PMO}$ .

| Temperature [K] | x coordinate | y coordinate |
|-----------------|--------------|--------------|
| 260             | 0.4566       | 0.4676       |
| 280             | 0.4663       | 0.4608       |
| 300             | 0.4879       | 0.4472       |
| 320             | 0.5155       | 0.4300       |
| 340             | 0.5313       | 0.4169       |
| 360             | 0.5503       | 0.4017       |
| 380             | 0.5660       | 0.3896       |
| 400             | 0.5833       | 0.3765       |
| 420             | 0.5964       | 0.3663       |
| 440             | 0.5788       | 0.3632       |
| 460             | 0.6133       | 0.3526       |

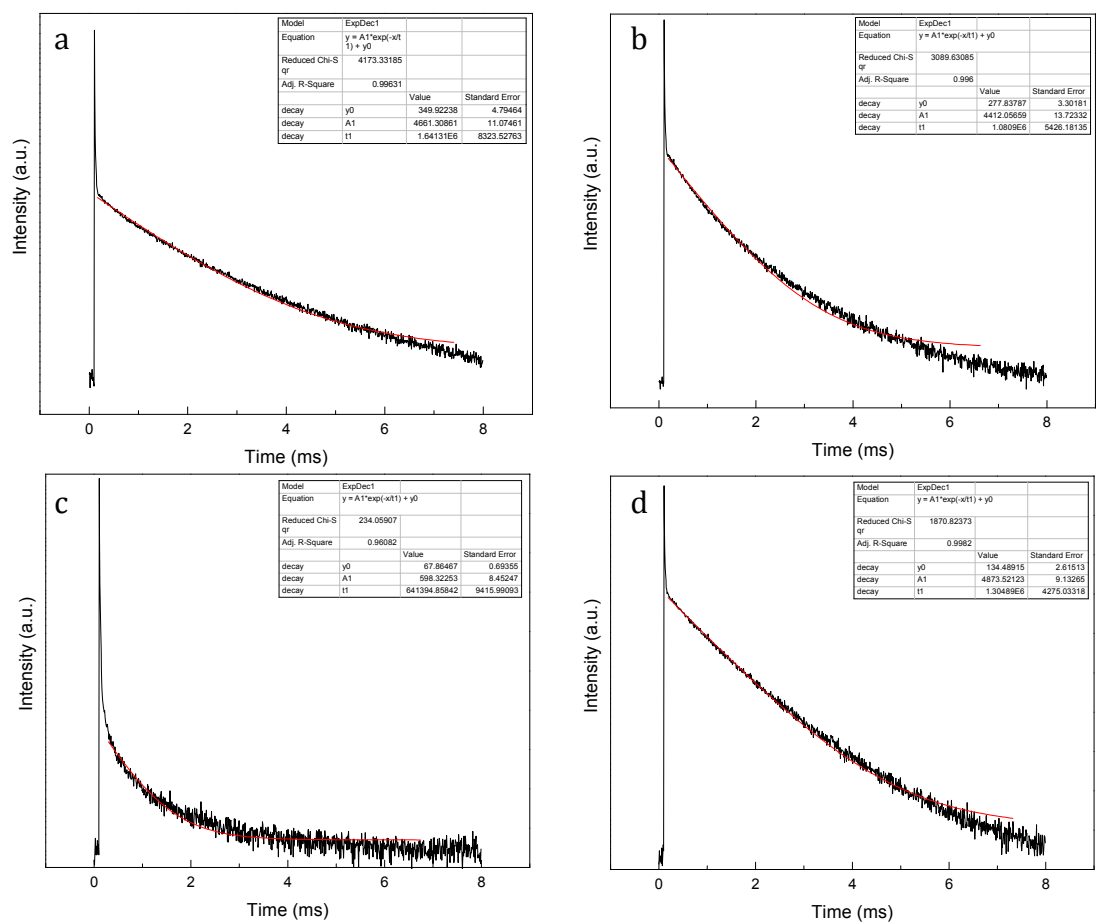

Fig. S14 Decay profiles for sample  $\text{Eu}_{0.50}\text{Tb}_{0.50}\text{DPA-PMO}$  a) 260 K observed at 544.6 nm (Tb), b) 260 K observed at 617.1 nm (Eu), c) 460 K observed at 544.6 nm (Tb), d) 460K observed at 617.1 nm (Eu). All decay times were recorded when exciting at 326.0 nm.



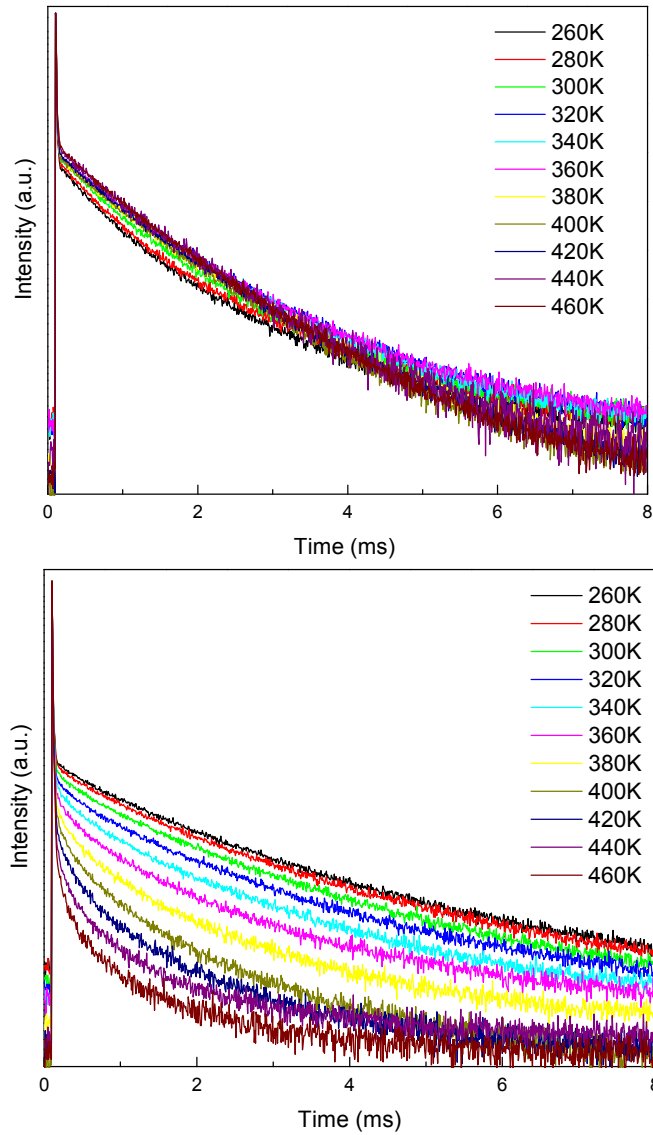

Fig. S15 Luminescence decay curves of (top)  ${}^5D_0 \rightarrow {}^7F_2$  (617.1 nm,  $\text{Eu}^{3+}$ ) and (bottom)  ${}^5D_4 \rightarrow {}^7F_5$  (544.6 nm,  $\text{Tb}^{3+}$ ) for  $\text{Eu}_{0.50}\text{Tb}_{0.50}\text{DPA-PMO}$  material recorded at different temperatures (the decay times were recorded when exciting at 326.0 nm).

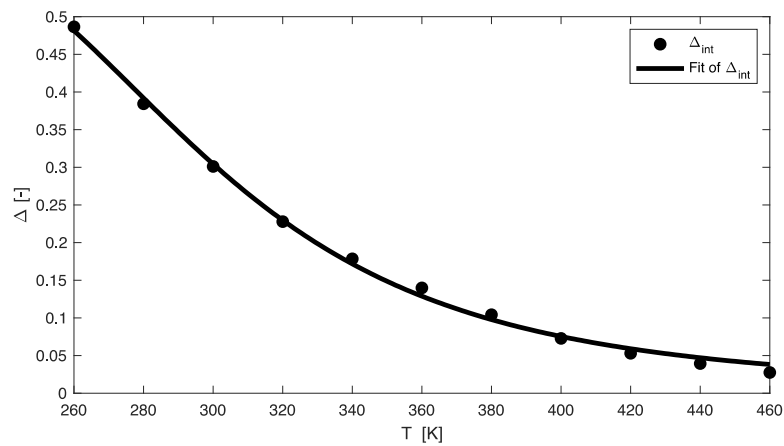

Fig. S16 Plot presenting the calibration curve for  $\text{Eu}_{0.75}\text{Tb}_{0.25}\text{DPA-PMO}$  material when eqn (2) is employed. The points show the experimental delta parameters and the solid line shows the best fit of the experimental points using eqn (2) ( $R^2 = 0.99774$ ).

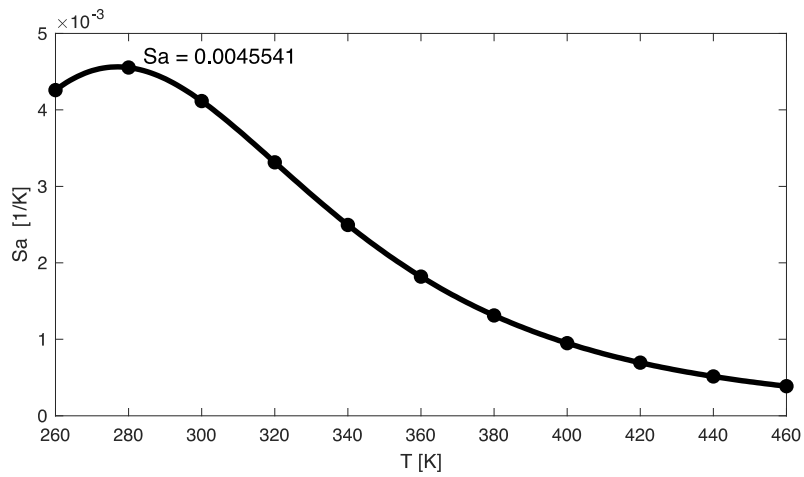

Fig. S17 Plot presenting the absolute sensitivity  $S_a$  values at varied temperatures (260K – 460K) for  $\text{Eu}_{0.75}\text{Tb}_{0.25}\text{DPA-PMO}$ . The solid lines are guides for eyes.

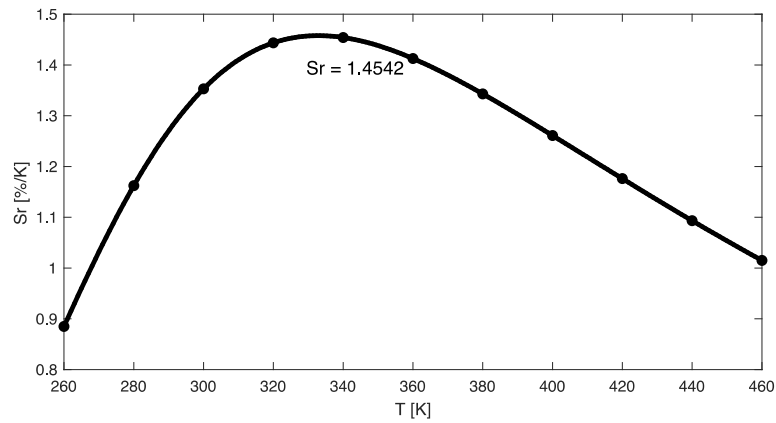

Fig. S18 Plot presenting the relative sensitivity  $S_r$  values at varied temperatures (260K – 460K) for compound  $\text{Eu}_{0.75}\text{Tb}_{0.25}\text{DPA-PMO}$ . The solid lines are guides for eyes.

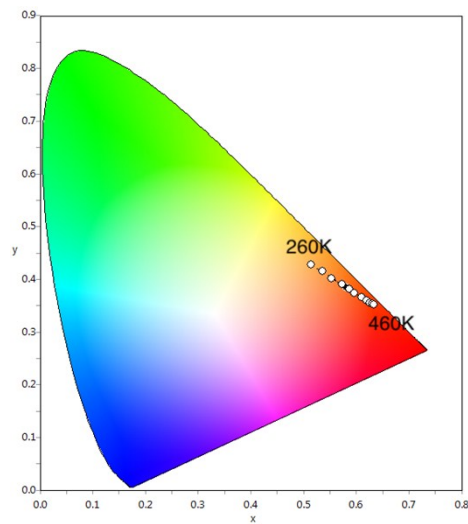

Fig. S19 CIE coordination diagram where the change of color for the  $\text{Eu}_{0.75}\text{Tb}_{0.25}\text{DPA-PMO}$  material is shown from 260 K to 460 K.

Table S7. CIE color coordinates (x, y) at different temperatures for  $\text{Eu}_{0.75}\text{Tb}_{0.25}\text{DPA-PMO}$ .

| Temperature [K] | x coordinate | y coordinate |
|-----------------|--------------|--------------|
| 260             | 0.5151       | 0.4271       |
| 280             | 0.5360       | 0.4146       |
| 300             | 0.5535       | 0.4017       |
| 320             | 0.5736       | 0.3898       |
| 340             | 0.5872       | 0.3805       |
| 360             | 0.5968       | 0.3729       |
| 380             | 0.6100       | 0.3655       |
| 400             | 0.6193       | 0.3588       |
| 420             | 0.6262       | 0.3551       |
| 440             | 0.6312       | 0.3532       |
| 460             | 0.6331       | 0.3523       |

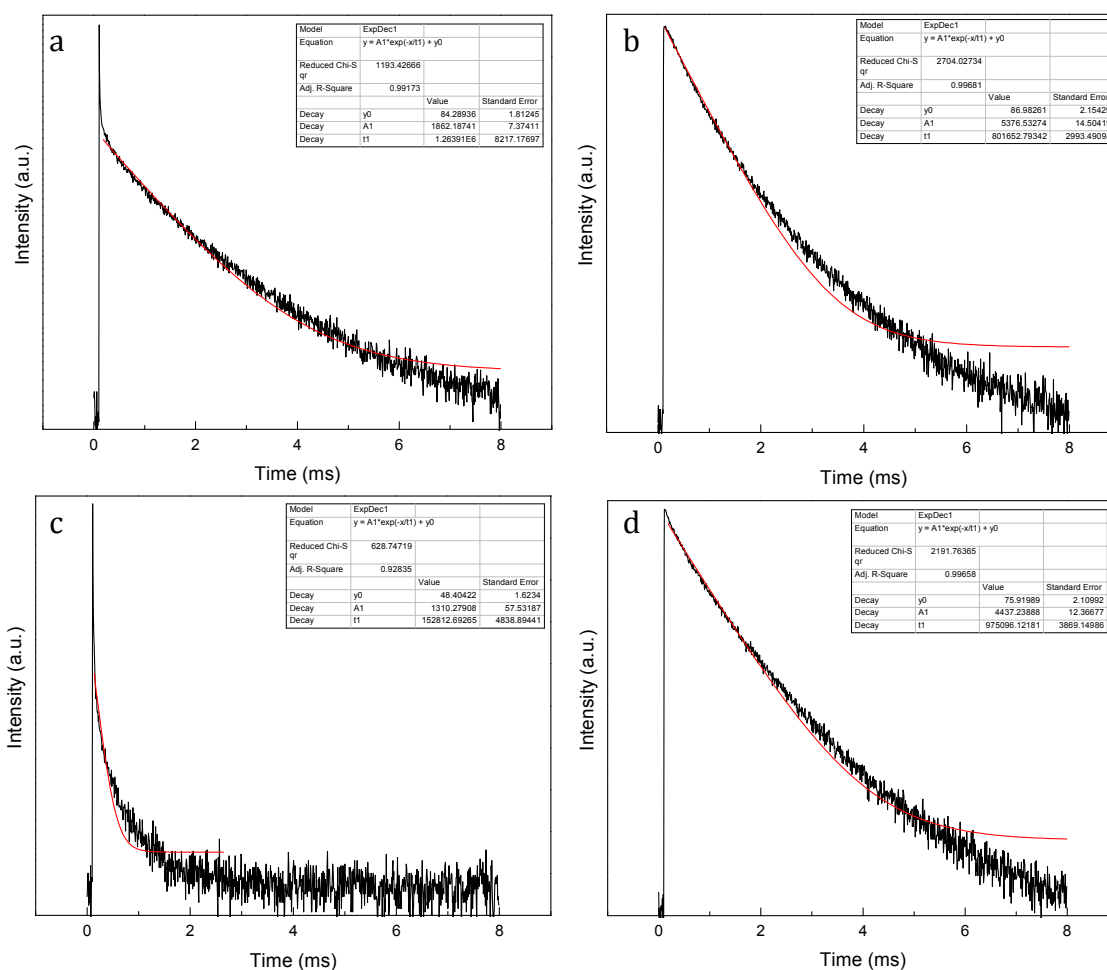

Fig. S20 Decay profiles for sample  $\text{Eu}_{0.75}\text{Tb}_{0.25}\text{DPA-PMO}$  a) 260 K observed at 544.0 nm (Tb), b) 260 K observed at 617.7 nm (Eu), c) 460 K observed at 544.0 nm (Tb), d) 460 K observed at 617.7 nm (Eu). All decay times were recorded when exciting at 326.0 nm.

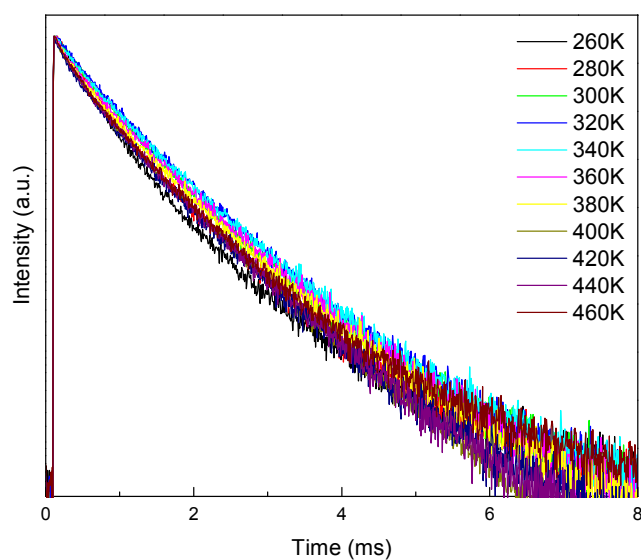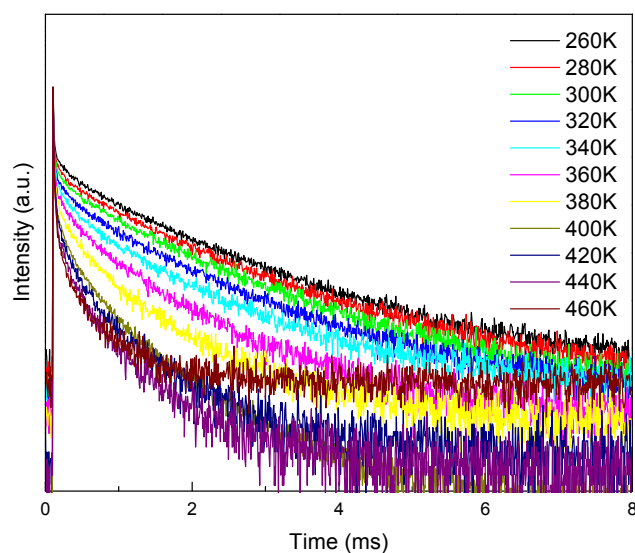

Fig. S21 Luminescence decay curves of (top)  ${}^5D_0 \rightarrow {}^7F_2$  (617.7 nm,  $\text{Eu}^{3+}$ ) and (bottom)  ${}^5D_4 \rightarrow {}^7F_5$  (544.0 nm,  $\text{Tb}^{3+}$ ) for  $\text{Eu}_{0.75}\text{Tb}_{0.25}\text{DPA-PMO}$  material recorded at different temperatures (the decay times were recorded when exciting at 326.0 nm)

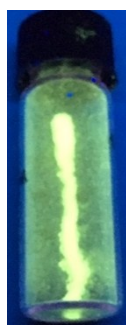

Fig. S22 Photo of  $\text{Sm}_{0.90}\text{Tb}_{0.10}\text{DPA-PMO}$  under 302 nm excitation under UV lamp.

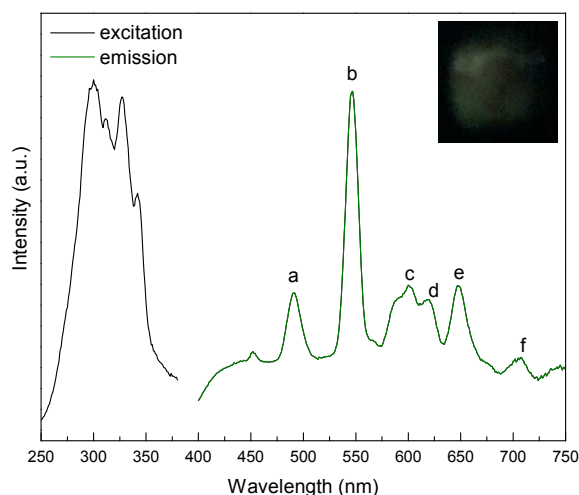

Fig. S23 Room temperature combined excitation-emission spectrum of sample  $\text{Sm}_{0.95}\text{Tb}_{0.05}\text{DPA-PMO}$  (excited a 326.0 nm and observed at 546.7 nm). The inset is a photo of the sample taken in the cryostat holder, excited at 326.0 nm with a xenon lamp.

Table S8. Assignment of peaks labeled in Fig. S23 ( $\text{Sm}_{0.95}\text{Tb}_{0.05}\text{DPA-PMO}$ ).

| Peak            | Wavelength (nm) | Wavenumber (cm <sup>-1</sup> ) | Transition                                            |
|-----------------|-----------------|--------------------------------|-------------------------------------------------------|
| <b>Emission</b> |                 |                                |                                                       |
| a               | 491.5           | 20346                          | $^5\text{D}_4 \rightarrow ^7\text{F}_6$ (Tb)          |
| b               | 546.8           | 18288                          | $^5\text{D}_4 \rightarrow ^7\text{F}_5$ (Tb)          |
| c               | 601.3           | 16633                          | $^5\text{G}_{5/2} \rightarrow ^6\text{H}_{7/2}$ (Sm)  |
| d               | 619.3           | 16147                          | $^5\text{D}_4 \rightarrow ^7\text{F}_3$ (Tb)          |
| e               | 647.8           | 15436                          | $^5\text{G}_{5/2} \rightarrow ^6\text{H}_{9/2}$ (Sm)  |
| f               | 707.5           | 14134                          | $^5\text{G}_{5/2} \rightarrow ^6\text{H}_{11/2}$ (Sm) |

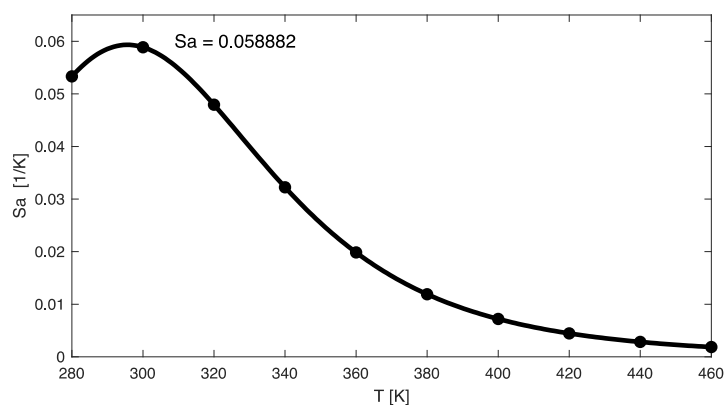

Fig. S24 Plot presenting the absolute sensitivity  $S_a$  values at varied temperatures (280K – 460K) for  $\text{Sm}_{0.95}\text{Tb}_{0.05}\text{DPA-PMO}$ . The solid lines are guides for eyes.

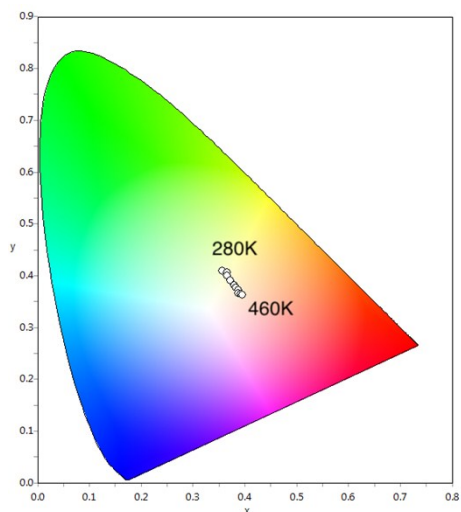

Fig. S25 CIE coordination diagram where the change of color for the  $\text{Sm}_{0.95}\text{Tb}_{0.05}\text{DPA-PMO}$  material is shown from 280 K to 460 K.

Table S9. CIE color coordinates (x, y) at different temperatures for  $\text{Sm}_{0.95}\text{Tb}_{0.05}\text{DPA-PMO}$ .

| Temperature [K] | x coordinate | y coordinate |
|-----------------|--------------|--------------|
| 280             | 0.3565       | 0.4097       |
| 300             | 0.3655       | 0.4058       |
| 320             | 0.3664       | 0.3934       |
| 340             | 0.3721       | 0.3900       |
| 360             | 0.3795       | 0.3819       |
| 380             | 0.3832       | 0.3759       |
| 400             | 0.3881       | 0.3723       |
| 420             | 0.3883       | 0.3654       |
| 440             | 0.3918       | 0.3642       |
| 460             | 0.3961       | 0.3629       |

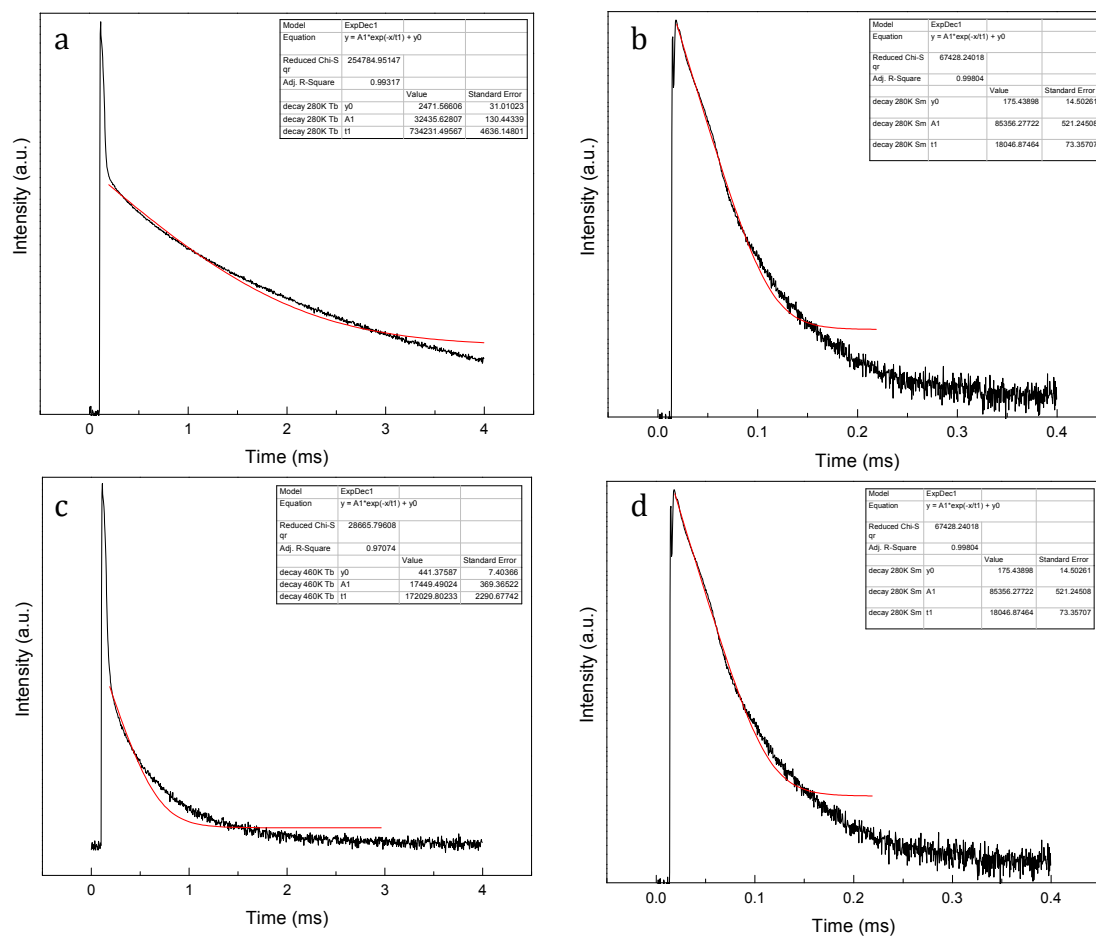

Fig. S26 Decay profiles for sample  $\text{Sm}_{0.95}\text{Tb}_{0.05}\text{DPA-PMO}$  a) 280 K observed at 546.8 nm (Tb), b) 280 K observed at 647.8 nm (Sm), c) 460 K observed at 546.8 nm (Tb), d) 460K observed at 647.8 nm (Sm). All decay times were recorded when exciting at 326.0 nm.

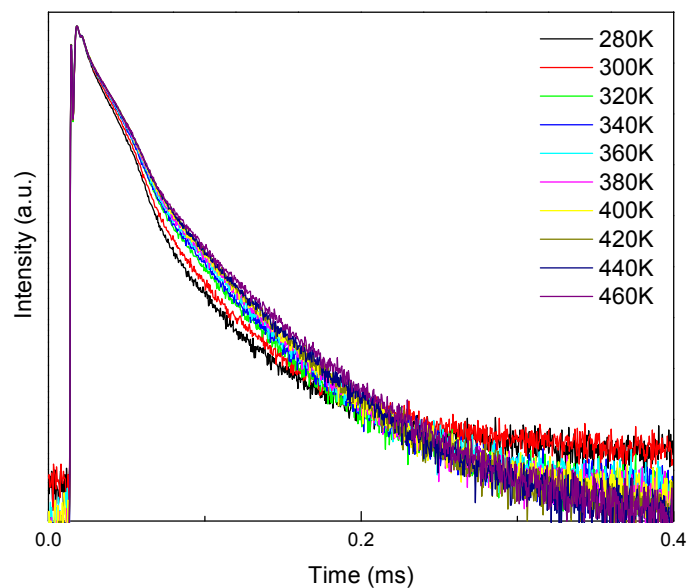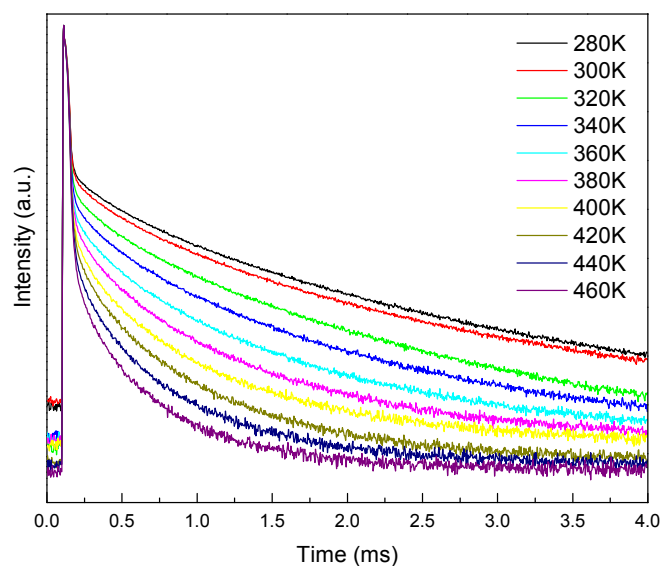

Fig. S27 Luminescence decay curves of (top)  ${}^5G_{5/2} \rightarrow {}^6H_{9/2}$  (647.8 nm,  $Sm^{3+}$ ) and (bottom)  ${}^5D_4 \rightarrow {}^7F_5$  (546.8 nm,  $Tb^{3+}$ ) for  $Sm_{0.95}Tb_{0.05}DPA-PMO$  material recorded at different temperatures (the decay times were recorded when exciting at 326.0 nm).

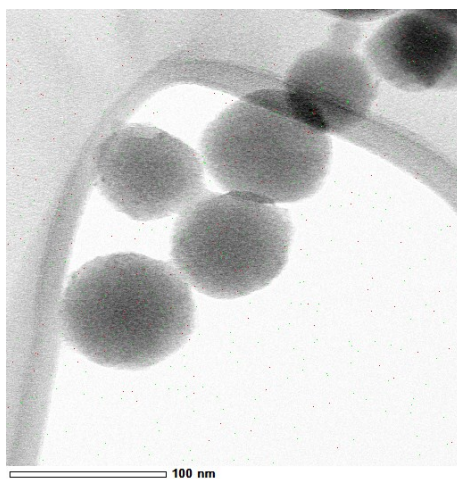

Fig. S28 TEM-EDX of  $Eu_{0.50}Tb_{0.50}DPA-PMO$  showing Eu/Tb grafted onto the PMO material.
